# Supplementary material for: Growth of thin vanadia nanobelts with improved lithium storage capacity in hydrothermally aged vanadia gels
Source: Royal Society of Chemistry journal article supplement (doi:10.1039/c1ce05802a), 2011-12-15
Supplement: c1ce05802a.pdf [file c1ce05802a.pdf]

## Supplementary information

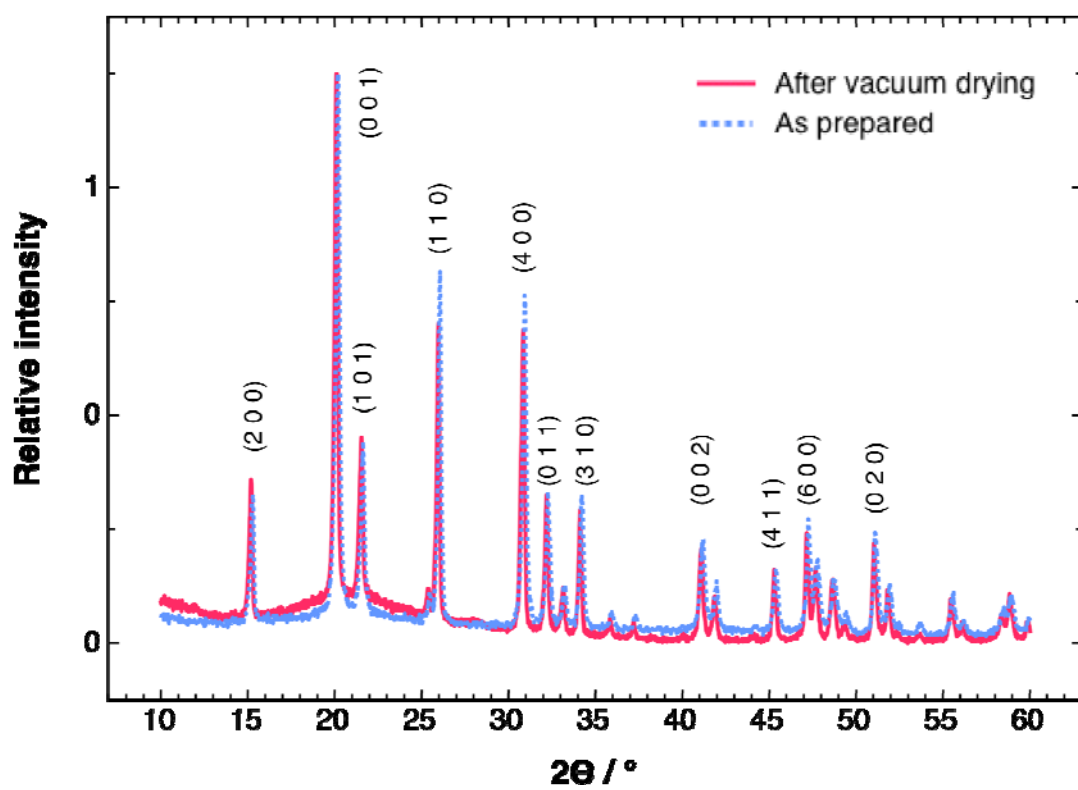

a.

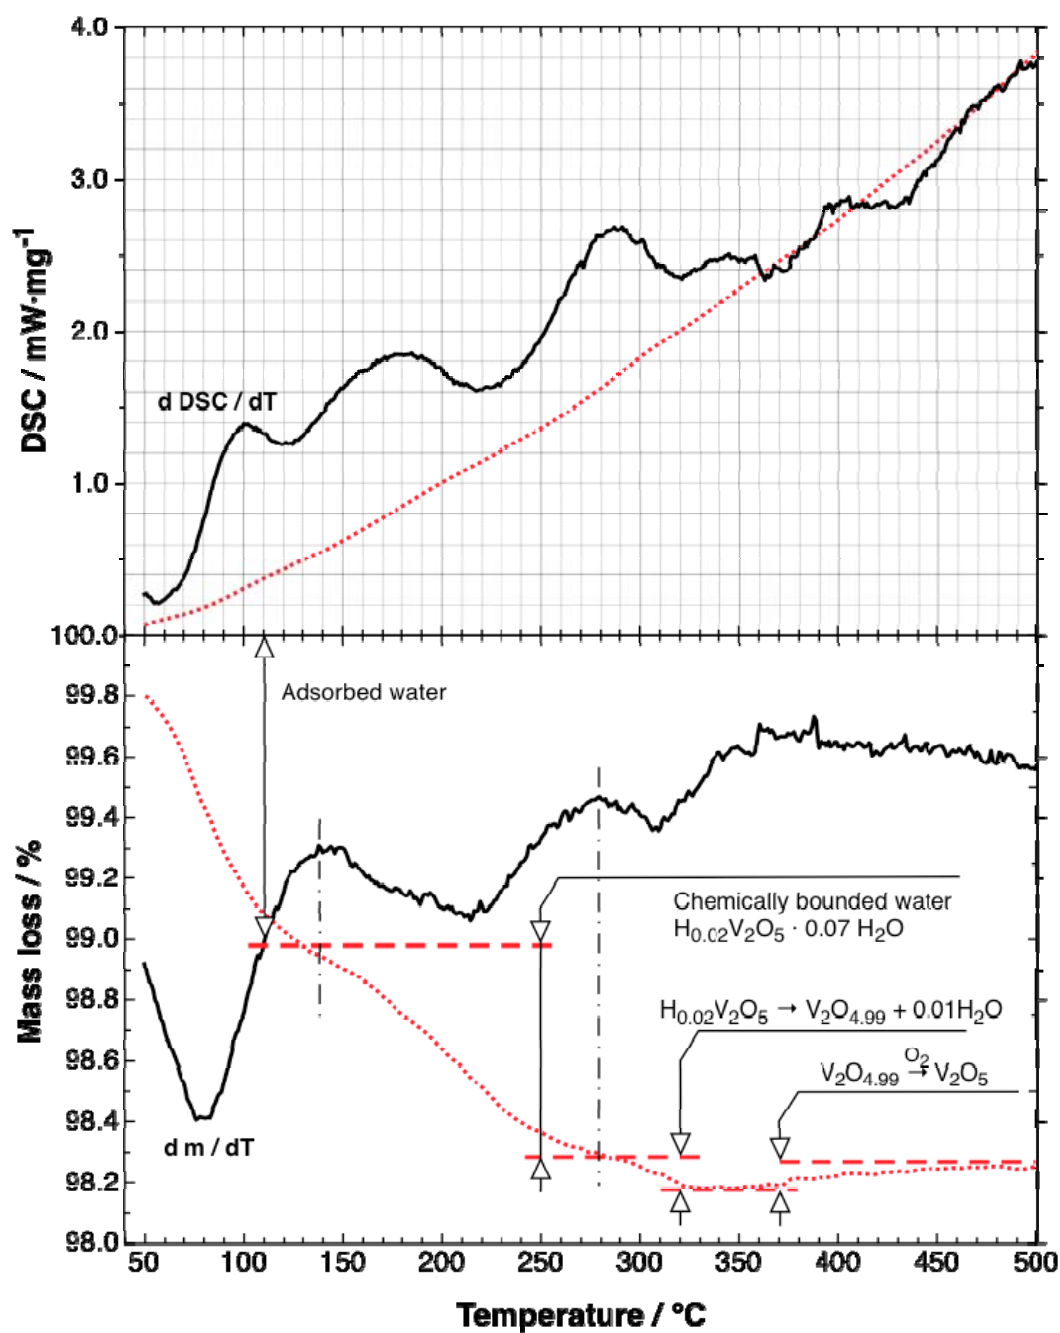

b.

Fig. S11. XRD and TGA analysis of nanobelts. (a) an XRD pattern of  $V_2O_5$  nanobelts as-prepared and vacuum - heated ( $180^\circ C$ ,  $10^{-5}$  atm), (b) an application of first derivatives of DSC and weight loss signals ( $dDSC/dT$  and  $dm/dT$ ) to split a TG curve into regions associated with different water binding modes.

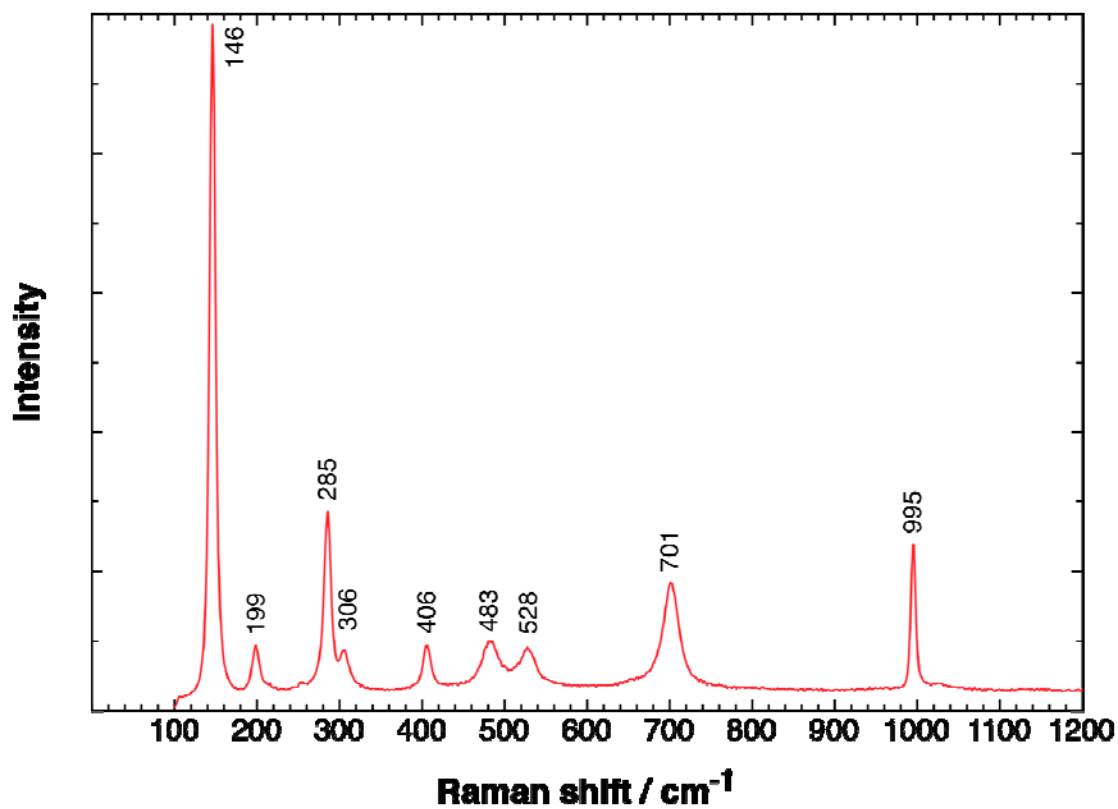

Fig. S12. Raman scattering spectrum of as-prepared vanadia nanobelts dried at 50°C in air. Spectrum is similar to crystalline  $\alpha$ - $V_2O_5$  (R. Baddour-Hadjean, E. Raekelboom, J.P. Pereira-Ramos, *Chem Mater*, 2006, **18**, 3548-3556).

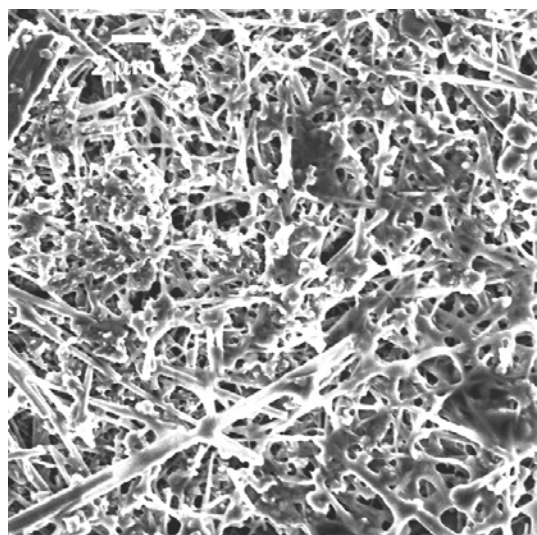

a.

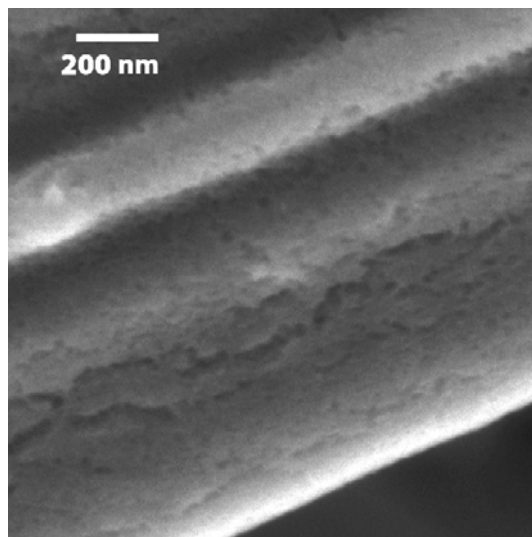

b.

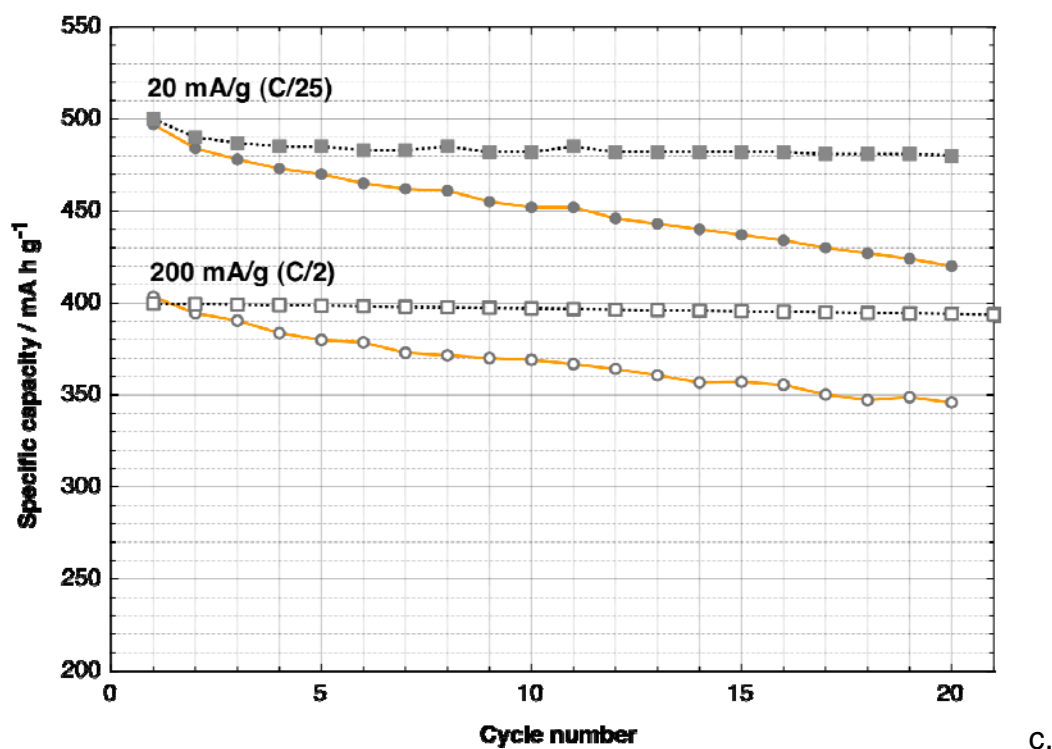

Fig. SI3. SEM images of SEI (solid-electrolyte interface) passive films grown on the vanadia nanobelts during first lithium intercalation semi-cycle. Cathode material (a) and a close-up of vanadia nanobelt surface (b) discharged to 2.15 V vs.  $\text{Li}^0/\text{Li}^+$ , (c) a nanocomposite material with stable cycling due to prevention of the growth of SEI achieved for the same vanadia nanobelts coated with carbon.

Table SI1. Comparison of discharge capacities of different vanadia-based materials

| Ref. | Material                                                              | Discharge rate         | Voltage range, V | Discharge capacity, mAh/h |                        | Number of cycles shown |
|------|-----------------------------------------------------------------------|------------------------|------------------|---------------------------|------------------------|------------------------|
|      |                                                                       |                        |                  | 1 <sup>st</sup> cycle     | 10 <sup>th</sup> cycle |                        |
| 1    | Vanadium oxide nanofibers                                             | 0.1 mA/cm <sup>2</sup> | 2.0 – 4.0        | 180                       | 115                    | 10                     |
| 2    | NH <sub>4</sub> V <sub>4</sub> O <sub>10</sub> nanobelts <sup>2</sup> | 12.5 mA/g              | 2.0 – 3.4        | 165                       | 110                    | 17                     |
| 3    | Nano-V <sub>2</sub> O <sub>5</sub> <sup>3</sup>                       | 0.1 mA/cm <sup>2</sup> | 1.75 – 4.0       | 375                       | 270                    | 25                     |
| 4    | V <sub>2</sub> O <sub>5</sub> nanoribbons <sup>4</sup>                | 440 mA/g               | 1.5 – 3.75       | 430                       | 330                    | 50                     |
| 5    | V <sub>2</sub> O <sub>5</sub> nanorods <sup>5</sup>                   | 150 mA/g               | 2.0 – 4.0        | 275                       | 250                    | 30                     |
| 6    | V <sub>2</sub> O <sub>5</sub> nanorods <sup>6</sup>                   | 10 mA/g                | 1.5 – 3.5        | 340                       | 275                    | 50                     |
| 7    | V <sub>2</sub> O <sub>5</sub> /CNT composite <sup>7</sup>             | 560 mA/g               |                  | 440                       | 430                    | 20                     |
| This | V <sub>2</sub> O <sub>5</sub>                                         | 20 mA/g                | 2.15 –           | 500                       | 450                    | 20                     |

|      |                               |          |        |     |     |    |
|------|-------------------------------|----------|--------|-----|-----|----|
| work | nanobelts                     |          | 4.0    |     |     |    |
| This | V <sub>2</sub> O <sub>5</sub> | 200 mA/g | 2.15 – | 400 | 370 | 20 |
| work | nanobelts                     |          | 4.0    |     |     |    |

1. S. Lutta, H. Dong, P. Zavalij and M. Whittingham, *Mater Res Bull*, 2005, **40**, 383-393.
2. K. Zhang, G. Zhang, X. Liu, Z. Su and H. Li, *J Power Sources*, 2006, **157**, 528-532.
3. C. Ban, N. Chernova and M. S. Whittingham, *Electrochem Commun*, 2009, **11**, 522-525.
4. S.-L. Chou, J.-Z. Wang, J.-Z. Sun, D. Wexler, M. Forsyth, H.-K. Liu, D. R. MacFarlane and S.-X. Dou, *Chem Mater*, 2008, **20**, 7044-7051.
5. A. Pan, J.-G. Zhang, Z. Nie, G. Cao, B. W. Arey, G. Li, S.-q. Liang and J. Liu, *J Mater Chem*, 2010, **20**, 9193-9199.
6. A. M. Glushenkov, M. F. Hassan, V. I. Stukachev, Z. Guo, H. K. Liu, G. G. Kuvshinov and Y. Chen, *J Solid State Electrochem*, 2010, **14**, 1841-1846.
7. J. Sakamoto, B. Dunn, *J Electrochem Soc*, 2002, **149**, A26-A30.
